# Supplementary material for: Effect of Selected Antidepressants on Placental Homeostasis of Serotonin: Maternal and Fetal Perspectives
Source: MDPI journal article supplement (doi:10.3390/pharmaceutics13081306), 2021-08-20
Supplement: s1 [file s1]

# Effect of Selected Antidepressants on Placental Homeostasis of Serotonin: Maternal and Fetal Perspectives

Hana Horackova, Rona Karahoda, Lukas Cervený, Veronika Vachalova, Ronja Ebner, Cilia Abad and Frantisek Staud \*

**Table S1.** Purity and orientation of microvillous (MVM) and basal (BM) membranes isolated from human term placenta. Data shown are means  $\pm$  SD,  $n \geq 4$ ; the enrichment factors (EF) were calculated relative to starting placental homogenate.

| Parameter                                      | MVM              | BM                |
|------------------------------------------------|------------------|-------------------|
| Orientation<br>(% right side out)              | 96.12 $\pm$ 7.35 | 81.03 $\pm$ 3.69  |
| Alkaline phosphatase<br>(fold enrichment)      | 15.09 $\pm$ 6.4  | 4.67 $\pm$ 1.33   |
| Dihydroalprenolol binding<br>(fold enrichment) | 9.73 $\pm$ 5.8   | 29.15 $\pm$ 12.37 |
